1 **Inversion Genotyping in the *Anopheles gambiae* Complex Using High-Throughput**  
2 **Array and Sequencing Platforms**

3  
4 R. Rebecca Love<sup>\*†</sup>, Marco Pombi<sup>‡</sup>, Moussa W. Guelbeogo<sup>§</sup>, Nathan R. Campbell<sup>¶</sup>,  
5 Melissa T. Stephens<sup>†</sup>, Roch K. Dabire<sup>††</sup>, Carlo Costantini<sup>‡‡‡</sup>, Alessandra della Torre<sup>‡</sup>,  
6 Nora J. Besansky<sup>\*†§§</sup>

7  
8 <sup>\*</sup>Eck Institute for Global Health, University of Notre Dame, Notre Dame, IN 46556, USA

9 <sup>†</sup>Department of Biological Sciences, University of Notre Dame, Notre Dame, IN 46556,  
10 USA

11 <sup>‡</sup>Dipartimento di Sanità Pubblica e Malattie Infettive, Istituto Pasteur Italia-Fondazione  
12 Cenci-Bolognetti, Università di Roma "La Sapienza", 00185 Rome, Italy

13 <sup>§</sup>Centre National de Recherche et Formation sur le Paludisme (CNRFP) Ouagadougou,  
14 Burkina Faso

15 <sup>¶</sup>GTseek LLC, Twin Falls, ID 83301, USA

16 <sup>††</sup>Institut de Recherche en Sciences de la Santé (IRSS)/Centre Muraz, Bobo-Dioulasso,  
17 Burkina Faso

18 <sup>‡‡</sup>Institut de Recherche pour le Développement (IRD) UMR MIVEGEC (University of  
19 Montpellier, CNRS 5290 IRD 224) Centre IRD de Montpellier, Montpellier, France

20

21

22 <sup>§§</sup>Corresponding author

23

24 **Running Title:** High-throughput inversion genotyping

25

26 **Key Words:** *Anopheles gambiae*, chromosomal inversion polymorphism, polytene

27 chromosome analysis, inversion genotyping, karyotyping, malaria vector, tag SNP

28

29 **Corresponding Author:** Nora J. Besansky, Department of Biological Sciences,

30 University of Notre Dame, Notre Dame, IN 46556 USA, nbesansk@nd.edu

31

32  
33  
34  
35  
36  
37  
38  
39  
40  
41  
42  
43  
44  
45  
46  
47  
48  
49  
50

## ABSTRACT

Chromosomal inversion polymorphisms have special importance in the *Anopheles gambiae* complex of malaria vector mosquitoes, due to their role in local adaptation and range expansion. The study of inversions in natural populations is reliant on polytene chromosome analysis by expert cytogeneticists, a process that is limited by the rarity of trained specialists, low throughput, and restrictive sampling requirements. To overcome this barrier, we ascertained tag single nucleotide polymorphisms (SNPs) that are highly correlated with inversion status (inverted or standard orientation). We compared the performance of the tag SNPs using two alternative high throughput molecular genotyping approaches versus traditional cytogenetic karyotyping of the same 960 individual *An. gambiae* and *An. coluzzii* mosquitoes sampled from Burkina Faso, West Africa. We show that both molecular approaches yield comparable results, and that either one performs as well or better than cytogenetics in terms of genotyping accuracy. Given the ability of molecular genotyping approaches to be conducted at scale and at relatively low cost without restriction on mosquito sex or developmental stage, molecular genotyping via tag SNPs has the potential to revitalize research into the role of chromosomal inversions in the behavior and ongoing adaptation of *An. gambiae* and *An. coluzzii* to environmental heterogeneities.

51 **INTRODUCTION**

52  
53 A chromosomal inversion is a structural mutation that arises when a chromosome  
54 segment breaks and reattaches in reverse orientation. Those that are retained as long-  
55 term polymorphisms often span hundreds or thousands of genes (Wellenreuther &  
56 Bernatchez 2018). Suppressed recombination in inversion heterozygotes (between  
57 inverted and non-inverted orientations) preserves allelic combinations on the inverted  
58 arrangement as haplotype blocks. The proposed role of inversions in adaptation to  
59 environmental heterogeneities arises from the expectation that locally adapted  
60 haplotype blocks can be maintained by spatially and temporally varying selection  
61 (Hoffmann & Rieseberg 2008; Kirkpatrick 2010; Kirkpatrick & Barton 2006; Schaeffer  
62 2008). Despite significant advances in genomic resources and technologies, a more  
63 detailed understanding of the precise alleles targeted by selection and their phenotypic  
64 consequences is largely lacking. One important roadblock to progress is the paucity of  
65 methodologies that allow inversion genotyping at scale.

66  
67 Polymorphic chromosomal inversions are abundant in all four of the major malaria-  
68 transmitting mosquitoes with pan-African distributions (Ayala *et al.* 2017; Coluzzi *et al.*  
69 2002), including the two sister species of the *Anopheles gambiae* complex studied here,  
70 *An. gambiae sensu stricto* (hereafter *An. gambiae*) and *An. coluzzii*. It has been  
71 suggested that these inversion polymorphisms promote ecological flexibility, enabling  
72 the successful exploitation of heterogeneous environments across tropical Africa (Ayala  
73 *et al.* 2017; Coluzzi *et al.* 2002; Costantini *et al.* 2009). Decades ago, intensive and

74 laborious cytogenetic studies demonstrated that inversion frequencies correlate with  
75 latitudinal gradients of aridity (Coluzzi *et al.* 1979), seasonal fluctuations in rainfall  
76 (Rishikesh *et al.* 1985), and local microhabitat differences (Coluzzi *et al.* 1979), patterns  
77 that persist stably over decades and across different geographic regions. These  
78 observations suggest that inversions confer an adaptive benefit in arid environments,  
79 where they achieve their highest frequencies. The epidemiological relevance of  
80 inversion polymorphism for malaria transmission and control, beyond habitat expansion  
81 and seasonal persistence of the mosquito disease vectors, was manifest by differences  
82 in vector house resting behavior (Coluzzi *et al.* 1979; Molineaux & Gramiccia 1980).  
83 The significantly greater tendency of the inversion-carrying fraction of the mosquito  
84 population to rest indoors caused non-uniform exposure to indoor-based vector control,  
85 reducing its efficacy.

86  
87 Despite the undeniable public health importance of this phenomenon, scientific  
88 understanding has barely advanced in the forty years since its initial discovery. No  
89 small reason for this hiatus is the technological and logistical difficulty of inversion  
90 genotyping. Polytene chromosome analysis of anopheline mosquitoes (della Torre  
91 1997) is the current basis of inversion genotyping. Strongly rate-limiting, sex-specific  
92 and stage-specific, it requires dissection, preparation, and microscopic analysis of  
93 ovarian polytene chromosomes by expert cytogeneticists with highly specialized training  
94 in the interpretation of chromosome banding patterns of the focal species.

95

96 DNA-based molecular assays would offer a much more rapid and widely available  
97 approach to inversion genotyping. These could be applied to mosquitoes regardless of  
98 sex, developmental stage, or method of preservation, and would require no more  
99 training than that normally associated with any molecular entomology laboratory. More  
100 than ten years ago, a rapid PCR assay was developed for genotyping of the 22-Mb 2La  
101 inversion (White *et al.* 2007), one of six common inversion polymorphisms in *An.*  
102 *gambiae* (all shared with *An. coluzzii* except one, 2Rj). The availability of this assay,  
103 which targets 2La inversion breakpoints, simplified the search for phenotypic traits and  
104 single nucleotide polymorphisms (SNPs) associated with the inverted orientation (2La).  
105 Studies employing this tool in the laboratory suggested that the inverted orientation was  
106 associated with increased thermal and desiccation tolerance, a thicker cuticle, higher  
107 body water content, a more aggressive upregulation of heat-responsive genes such as  
108 heat shock genes, and a higher energy budget relative to the alternative (2L<sup>a</sup>)  
109 arrangement (Cassone *et al.* 2011; Cheng *et al.* 2018; Fouet *et al.* 2012; Gray *et al.*  
110 2009; Reidenbach *et al.* 2014; Rocca *et al.* 2009). Importantly, this inversion  
111 genotyping tool also was used to advance the study of natural populations. Inversion  
112 2La was found to be associated with a reduced tendency to rest indoors and a lower  
113 malaria oocyst infection prevalence, corroborating historical evidence based on  
114 cytogenetic analysis (Coluzzi *et al.* 1979; Petrarca & Beier 1992; Riehle *et al.* 2017).  
115 Association mapping employing population pools of alternative 2La homokaryotypes  
116 revealed dozens of candidate SNPs significantly associated with desiccation tolerance  
117 (Ayala *et al.* 2019).  
118

119 However, molecular genotyping tools that perform robustly for the common inversions  
120 on the right arm of chromosome 2 (2Rj, 2Rb, 2Rc, 2Rd, 2Ru) have been lacking, with  
121 the sole exception of a newly available set of polymerase chain reaction (PCR)  
122 restriction fragment length polymorphism (RFLP) assays for 2Rb (Montanez-Gonzalez  
123 *et al.* 2020). Two previously developed PCR genotyping assays, one that targeted the  
124 breakpoints of this inversion and another that targets the breakpoints of inversion 2Rj,  
125 proved unreliable or had limited geographic application in natural populations,  
126 presumably due to structural variation in inversion breakpoint regions (Coulibaly *et al.*  
127 2007; Lobo *et al.* 2010). The newly developed PCR-RFLP genotyping assays for 2Rb  
128 (Montanez-Gonzalez *et al.* 2020), and additional genotyping assays under development  
129 for 2Rc (Montanez-Gonzalez, Vallera, Calzetta, Love, Pombi, Guelbeogo, Dabire,  
130 Costantini, Pichler, Petrarca, della Torre, Besansky, unpublished) exploit tag SNPs  
131 inside the rearranged region whose allelic state is strongly correlated with inversion  
132 orientation regardless of their position relative to the breakpoints (Love *et al.* 2019). To  
133 our knowledge, no DNA-based molecular assays exist for the genotyping of the other  
134 inversions in *An. gambiae* or *An. coluzzii*.

135  
136 We recently described a strategy that exploited the *An. gambiae* and *An. coluzzii*  
137 database of natural variation (Ag1000G; [www.malariagen.net/projects/ag1000g](http://www.malariagen.net/projects/ag1000g)) (Miles  
138 *et al.* 2017) to identify tag SNPs predictive of inversion orientation for all six common  
139 inversion polymorphisms in these species. Using these tags, we developed an  
140 algorithm capable of *in silico* inversion genotyping based on SNPs called from whole  
141 genome resequencing data (Love *et al.* 2019). This is a rapid and powerful approach

142 assuming that whole genome sequence data are already available or will be produced  
143 for other reasons. However, it does not satisfy experimental designs in which genomic  
144 sequence data is not otherwise required, and where its procurement would be cost-  
145 prohibitive. For the requisite statistical power, studies aimed at finding significant  
146 associations between inversions and behavioral or physiological phenotypes will likely  
147 require thousands of specimens of known inversion genotype. Here, we develop cost-  
148 effective high-throughput molecular methods of inversion genotyping to address this  
149 need. Using tag SNPs ascertained in Ag1000G (Love *et al.* 2019), we compare two  
150 molecular platforms that allow inversion genotyping of hundreds or thousands of  
151 individual *An. coluzzii* and *An. gambiae* mosquitoes at tens or hundreds of tag SNPs  
152 targeting all six inversions in a single experiment. One platform, the TaqMan  
153 OpenArray (Life Technologies), referred to hereafter as OA, is a 5'-exonuclease method  
154 that genotypes tag SNPs based on PCR in the presence of allele-specific probes, both  
155 labeled with different reporter dyes. The other, Genotyping-in-Thousands by  
156 sequencing (GT-seq), is a custom amplicon sequencing approach that genotypes tag  
157 SNPs by next-generation sequencing of multiplexed PCR products (Campbell *et al.*  
158 2015). Using 960 individual *An. gambiae* and *An. coluzzii* mosquitoes previously  
159 karyotyped cytogenetically and up to 184 SNP markers, we show that both approaches  
160 successfully predict inversion genotypes for the common polymorphic inversions in  
161 these species (excluding 2Rc in *An. gambiae* and 2Rd in *An. coluzzii*). Our data  
162 suggest that these methods not only offer efficiency of scale and cost, but also  
163 represent substantial improvements in genotyping accuracy relative to the classical  
164 cytogenetic approach.



165  
166  
167  
168  
169  
170  
171  
172  
173  
174  
175  
176  
177  
178  
179  
180  
181  
182  
183  
184  
185  
186  
187

## MATERIALS AND METHODS

### Mosquito study population

Burkina Faso lies in the arid Sudan savanna belt of West Africa. In this region, *An. gambiae* and *An. coluzzii* are highly polymorphic for chromosomal inversions (Costantini *et al.* 2009). Sampling was conducted in a 35 x 65 km area located 30 km SW of the capital, Ouagadougou. In total, 85 villages approximately 5 km distant from each other were sampled in 2006. Mosquito collection was performed indoors in the early afternoon by pyrethrum spray catch in 3-5 compounds per village. Morphological identification and initial processing was performed in the field under a dissecting microscope. *An. gambiae* s.l. females at the appropriate stage for polytene chromosome analysis were each assigned a unique numerical code, whose value was incremented by '1' with each new mosquito as the collection progressed. Ovaries of each female mosquito were immediately cropped and placed in an individual 1.5 ml tube containing Carnoy's fixative (1:3 glacial acetic acid: absolute ethanol), labeled with its unique numerical code. The corresponding carcass was placed in an individual 1.5 ml tube containing a desiccant (silica gel) and a matching numeric label unique for that mosquito. Ovaries were stored at -20°C, and carcasses maintained at ambient temperature before further processing.

Mosquito DNA was extracted from the carcass using a CTAB method (Chen *et al.* 2010) and identified to species using rDNA-based PCR assays (Favia *et al.* 1997; Scott *et al.* 1993). The corresponding ovaries were prepared for karyotype analysis according to

188 standard procedures (della Torre 1997). The banding pattern was observed under a  
189 phase-contrast microscope (400x) and interpreted with reference to the cytogenetic  
190 map (George *et al.* 2010; Pombi *et al.* 2008). Karyotype analysis was performed on  
191 >1,770 mosquitoes. The effort was divided equally between two groups without spatial  
192 or temporal sampling bias, based strictly on mosquitoes with odd- versus even-valued  
193 numerical codes. For this study, we selected a subset of 960 mosquitoes based on  
194 their cytogenetic karyotypes, with the goal of achieving maximum possible inversion  
195 genotype balance for the purpose of validating the molecular tag SNPs.

196

### 197 **OA and GT-seq assay design and genotyping**

198 Because the methods we used to develop and validate the set of tag SNPs for *in silico*  
199 inversion genotyping (Love *et al.* 2019) were still being refined at the time the present  
200 study was initiated, the initial list of candidate molecular tags differed slightly from the *in*  
201 *silico* set, though overlap was extensive. One minor methodological difference in  
202 ascertainment was that, for the molecular tag SNPs, genotypic concordance was not  
203 based on ten bootstrap replications of a training set, but instead was based on the  
204 simple percentage of mosquitoes with a matching inversion- and SNP-genotype out of  
205 the total mosquito sample analyzed for that inversion in the Ag1000G variation  
206 database. This was calculated separately for each of three inversion genotypes  
207 [homozygous standard (*i.e.*, uninverted), heterozygous, homozygous inverted], with the  
208 minimum value taken as the conservative genotypic concordance. The other  
209 methodological difference was that ascertainment of tag SNPs in 2Rc was based on  
210 slightly different data partitions: (i) *An. coluzzii*, and (ii) *An. gambiae* after exclusion of

211 BAMAko (Manoukis *et al.* 2008) and specimens carrying the inverted arrangement of  
212 2Ru. Beginning with a ranked list of tags based on descending genotypic concordance,  
213 we applied filters (described below) that narrowed the numbers of tags based on design  
214 criteria unique to each platform.

215  
216 OA: TaqMan assays were designed by the Dana-Farber/Harvard Cancer  
217 Center (DF/HCC) Genotyping and Genetics for Population Sciences Core, a unit of the  
218 Partners HealthCare Center for Personalized Genetic Medicine. Assays designed for  
219 this platform require forward and reverse PCR primers which produce ~100 base  
220 amplicons containing the tag SNP, and additionally require two allele-specific  
221 fluorescently labeled 30-bp probes ('reporters') that discriminate between the reference  
222 allele at the tag (VIC dye) and the alternate allele (FAM dye). Candidate SNPs were  
223 filtered out if they were surrounded by runs of nucleotides and low complexity regions  
224 that interfered with acceptable primer design parameters. Further filtering was  
225 performed if candidate SNPs were surrounded by high frequency variants in the 25  
226 bases immediately upstream or downstream of the tag SNP. High frequency was  
227 defined as  $\geq 5\%$  in at least one inversion genotype (*i.e.*, homozygous standard,  
228 heterozygous, homozygous inverted) or at least two population samples analyzed for a  
229 given inversion in the Ag1000G database. [As discussed in Love *et al.* (2019), the  
230 population samples analyzed varied depending upon the inversion under consideration,  
231 due to inferred taxonomic or geographic population structure based on principal  
232 components analysis]. Such high frequency variants were deemed likely to significantly  
233 interfere with successful probe annealing. Due to the highly polymorphic nature of the

234 *An. gambiae* genome (Miles *et al.* 2017), these filters eliminated many candidate tags.  
235 To ensure that we retained at least six tag SNPs per inversion for genotyping, we were  
236 compelled to reduce the genotypic concordance threshold below the 0.8 level imposed  
237 in Love *et al.* (2019). Even lowering the threshold to 0.7 for 2Rc tags in *An. gambiae*  
238 failed to yield more than three candidates, and we declined to reduce that threshold  
239 further. Minimum genotypic concordances for each inversion were 0.7 for 2Rb, 2Rc and  
240 2Ru; 0.75 for 2Rd; 0.9 for 2Rj; and 0.9925 for 2La.

241  
242 After filtering, we retained 54 tag SNPs in total, ranging from 6 to 11 per inversion  
243 except 2Rc in *An. gambiae*, with only 3 tag SNPs. Based on these 54 tags, we selected  
244 a custom 64-assay TaqMan OpenArray genotyping plate design whose 3,072 reaction  
245 through-holes are divided into 48 sub-arrays, each with 64 through-holes (54 of which  
246 were preloaded with a single custom assay). One such plate genotypes 48 mosquitoes  
247 at 54 tags (2,592 genotypic assays).

248  
249 DNA quantification of genomic DNA from 960 mosquitoes was conducted by DF/HCC  
250 via picogreen-based fluorimetry; average DNA concentration was 26 ng/ul (range, 0.1-  
251 58.1 ng/ul). OA requires 250 copies of a haploid genome for each individual through-  
252 hole [0.0675 ng of *An. gambiae* genomic DNA, assuming a haploid genome size of 0.27  
253 pg (260 Mb); (Besansky & Powell 1992)]; 64 through-holes require only ~4-5 ng DNA  
254 per mosquito. DF/HCC performed the genotyping using endpoint detection of  
255 fluorescent signals on the TaqMan OpenArray Genotyping System, following  
256 manufacturer's specifications (Applied Biosystems, Foster City CA, USA). Conditions

257 for genotyping are available upon request to DF/HCC. Tag SNPs, primers and probes  
258 for genotyping assays are provided in Table S1.

259  
260 *GT-seq*: GTseek LLC conducted multiplex primer design and consulted on GT-seq  
261 optimization. Because this multiplexed amplicon sequencing approach uses only  
262 unlabeled PCR primers to produce 50-100 bp amplicons spanning a tag SNP, high  
263 frequency variants neighboring the tag are not a limitation. However, the highly  
264 multiplexed nature of GT-seq, allowing simultaneous amplification of up to 500 SNP loci  
265 per individual for thousands of individuals, requires that the primer pool be optimized not  
266 only for individual amplicons (*e.g.*, by avoiding nucleotide runs, low complexity regions,  
267 and primer-dimer), but also to minimize primer interactions across loci and mis-priming  
268 with other amplicons. The initial list of candidate tag SNPs ranked by concordance was  
269 filtered based on the output of custom perl scripts to evaluate primer pools (Campbell *et*  
270 *al.* 2015, <https://github.com/GTseq>). Minimum concordance values varied by inversion  
271 (>0.8 for 2Rc; >0.85 for 2Rd; >0.9 for 2Rb, 2Rj, and 2Ru; >0.995 for 2La). Candidate  
272 tag SNPs for 2La, which were overly abundant, were pruned by selecting every third  
273 candidate from a list ordered by chromosome position.

274  
275 Following Campbell *et al.* (2015), Illumina sequencing primer sites were added to locus-  
276 specific forward and reverse primer sequences to create PCR1 primers, which were  
277 ordered along with PCR2 primers (a set of 96 i5 and i7 indexes) from Integrated DNA  
278 technologies (IDT) in 96-well plate format at a 25nmole synthesis scale and a  
279 concentration of 200  $\mu$ M in Tris-EDTA pH 8.0 buffer. GT-seq test libraries were

280 prepared and sequenced by the University of Notre Dame Genomics and Bioinformatics  
281 Core Facility (GBCF) from a subset of specimens (n=192) to refine preparation  
282 techniques and identify primers that produced PCR artefacts or were overrepresented.  
283 Following optimization, primer pools were re-made to include only the optimized panel  
284 of PCR 1 primers. Tag SNPs and PCR 1 primers for GT-seq genotyping are listed in  
285 Table S2.

286  
287 The final libraries prepared by the GBCF included the same 192 specimens used during  
288 optimization and 765 additional specimens. They were constructed without optional  
289 exo-SAP treatment following Campbell *et al.* (2015), with the following modifications to  
290 PCR conditions and post library cleanup: PCR1: 95 °C – 15 min; 5 cycles [95 °C – 30s,  
291 3% ramp down to 57°C–30s, 72°C–2min]; 10 cycles [95 °C–30 s, 65 °C–30 s, 72 °C–30  
292 s]; 4 °C hold. PCR2: 95 °C – 15 min; 10 cycles [95°C–10s; 62°C–30s; 72°C–30s];  
293 72°C–5min; 4°C hold. Following PCR2, each plate of samples was purified and  
294 normalized using the Just-a-Plate 96 PCR Purification and Normalization Kit (Charm  
295 Biotech) according to manufacturer’s instructions. Following normalization, 10 ul of  
296 each sample per 96 well plate (up to 960 ul total) was then combined into a 1.5-mL  
297 Eppendorf tube, for a total of 10 tubes. From each tube, 300ul was transferred to a  
298 fresh 1.5-mL Eppendorf tube for two rounds of purification using AMPure XP  
299 paramagnetic beads (Beckman Coulter, Inc.) with ratios of 0.5X and 1.3X respectively.  
300 Purified libraries were eluted in 35 ul 1xTE and transferred to fresh 1.5-mL tubes before  
301 adding 3.5 ul buffer EB containing a 1% Tween 20 solution.

302

303 Each of the 10 plate libraries was quality assessed on an Agilent Bioanalyzer 2100 High  
304 Sensitivity chip and quantified by qPCR using the Illumina Kapa Library Quantification  
305 Kit (Roche, Cat. #KK4824). The libraries were then normalized to a concentration of 4  
306 nM and pooled for sequencing. The final pooled library containing 957 *An. gambiae* and  
307 *An. coluzzii* individuals was sequenced on a single lane of Illumina NextSeq 500 v2.5  
308 (75 cycle) High Output flowcell using a dual indexed 75bp single-end read. Base calling  
309 was done by Illumina Real Time Analysis (RTA) v2 software.

310  
311 Using scripts described in the bioinformatics pipeline of Campbell *et al.* (2015) and  
312 available on Github (<https://github.com/GTseq>), sequencing data were demultiplexed  
313 into single fastq files for each individual sample. Individuals were genotyped at each  
314 locus with a perl script (GTseq\_Genotyper\_v3.pl) that counts the occurrence of each  
315 allele at a locus within individual fastq files. The ratio of allele 1 to allele 2 counts was  
316 used to generate a genotype for each locus with total read counts >10, following the  
317 methods and cut-offs of Campbell *et al.* (2015).

318

### 319 **Filtering and calling multilocus inversion genotypes**

320 The procedures for filtering and calling molecular inversion genotypes were the same  
321 for both OA and GT-seq platforms. Filtering steps were as follows. For each tag SNP,  
322 we calculated the percentage of mosquito specimens in the sample with a genotype call  
323 at that tag (the SNP call rate). If SNP call rates were <80%, the underperforming tag  
324 SNPs were eliminated from further analysis. In addition, for each mosquito specimen  
325 analyzed, we calculated the percentage of tag SNPs with a genotype call (the specimen

326 call rate). If the specimen call rate was <80%, that specimen was excluded from further  
327 analysis. Note that the mosquito specimens in the sample varied according to the  
328 inversion under consideration: 2La, 2Rb and 2Ru tags perform in both species, 2Rj and  
329 2Rd tags are *An. gambiae*-specific, and defined subsets of 2Rc tags (referred to in this  
330 work as 2Rc\_col and 2Rc\_gam) apply respectively to *An. coluzzii* or *An. gambiae*  
331 individuals.

332  
333 To calculate the multilocus inversion genotype for each specimen, we converted the raw  
334 genotype data for individual tag SNPs to the count of alternate alleles (if necessary),  
335 where '0' is a homozygote for the reference allele, '1' is a heterozygote carrying one  
336 reference allele, and '2' is a homozygote for the alternate allele. Next, we averaged the  
337 number of alternate alleles present across all tag SNPs in a given inversion, and binned  
338 this average to produce a predicted inversion genotype (0-0.67, 0; 0.68-1.33, 1; 1.34-2,  
339 2). Multilocus molecular genotypes were then compared to each other and with  
340 cytogenetically determined inversion genotypes.

341

#### 342 **Code and data availability**

343 Supplemental files are available at FigShare. Table S1 contains OA tag SNP ID  
344 numbers, locations, reference and alternate alleles, forward and reverse primer  
345 sequences, and probe sequences. Table S2 contains GT-seq tag SNP ID numbers,  
346 locations, reference and alternate alleles, and forward and reverse primer sequences.  
347 Table S3 contains specimen ID numbers and inversion genotypes (cytogenetic, OA,  
348 and GT-seq) for each individual mosquito. Code used to generate the data can be



349 found on Github (<https://github.com/GTseq> and  
350 [https://github.com/rrlove/molec\\_karyo\\_notebooks](https://github.com/rrlove/molec_karyo_notebooks)).

351

352  
353  
354  
355  
356  
357  
358  
359  
360  
361  
362  
363  
364  
365

## RESULTS AND DISCUSSION

### OA

Custom OA plates were used to genotype 960 individual *An. gambiae* and *An. coluzzii* mosquitoes at 54 tag SNP loci. The SNP call rate for one of the 54 loci fell below the 80% threshold (77.7%) and was eliminated from the panel. After filtering, the SNP call rate averaged 99.4% for the remaining 53 tags (range, 98.3%-100%). Three specimens were dropped from analysis due to the belated determination that their cytogenetic genotypes were ambiguous. Four additional mosquito specimens were dropped from further OA analysis due to unacceptably low specimen call rates (ranging from 17.5% to 52.6%). The remaining 953 specimens had an average specimen call rate of 99.3% (range, 87.7%-100%). The final number of OA tags per each inversion, and their approximate genomic position within the inversion, are shown in Table 1 and Figure 1.

### GT-seq

Sequencing from one NextSeq lane included the pooled GT-seq library of 957 *An. gambiae* and *An. coluzzii*, as well as another GT-seq pooled library of 235 *An. funestus* mosquitoes pertaining to an independent experiment to be described elsewhere. This produced ~359M total reads, of which ~236M could be assigned to the 957 *An. gambiae* and *An. coluzzii* specimens based on their barcode sequences. Read counts from each of the ten *An. gambiae*-*An. coluzzii* sample plates ranged from 17.5M to 27.6M reads per plate and read counts per individual mosquito averaged 246,925 (SD 85,614). The tag SNP call rate was below the 80% threshold for three tags, which were

375 subsequently dropped from the genotyping panel. For the remaining 131 tags, SNP call  
376 rates averaged 98.2% (range, 80.25% to 100%). As was the case for OA analysis,  
377 three specimens were dropped due to ambiguous cytogenetic genotypes. Of the  
378 remaining 954, two were considered to have failed because they had specimen call  
379 rates below the 80% threshold, and were thus dropped. Those 952 within acceptable  
380 limits had average specimen call rates of 98.2% (range, 93.1% to 100%). The final  
381 number of GT-seq tags per each inversion, and their approximate genomic position  
382 within the inversion, are shown in Table 1 and Figure 1.

383

#### 384 **Concordance**

385 The inversion genotypes inferred for each specimen by the three methods  
386 (cytogenetics, OA, and GT-seq) are provided in Table S3. We compared these  
387 genotypes to assess their concordance. Due to our filtering rules, not every specimen  
388 had genotype calls by both molecular methods. We focused our assessment on the  
389 subset of specimens that were successfully genotyped with all three methods (435 for  
390 *An. gambiae*, and 513 for *An. coluzzii*). As summarized in Figure 2 and Table 2, over  
391 90% of the relevant mosquito samples had concordant genotypes for all three methods  
392 with the notable exception of *An. gambiae* genotyped for 2Rc, where three-way  
393 concordance fell to ~81%. We discuss the special case of 2Rc in *An. gambiae* more  
394 fully below; here, we concentrate on the five other inversions and 2Rc in *An. coluzzii*.

395

396 A strikingly high number of specimens had multilocus molecular genotypes inferred from  
397 both OA and GT-seq that agreed, but were jointly discordant with cytogenetics. Except

398 for 2Rj with negligible discordance (and correspondingly low levels of polymorphism in  
399 our sample), the cytogenetic versus multilocus molecular discordance affected from 14  
400 to 73 mosquito specimens per inversion, representing 3% to 8% of the mosquito  
401 samples (mean, 5%). Although cytogenetic karyotyping may be considered the gold  
402 standard for inversion genotyping, two important considerations lend considerable  
403 confidence to molecular genotypes, particularly when both molecular approaches  
404 concur. First, while none of the tag SNPs are deterministic (*i.e.*, none is perfectly and  
405 invariably correlated with inversion orientation), OA and GT-seq infer genotypes based  
406 on multiple predictive tags scored per inversion, thus providing weight of numbers.  
407 Second, the final set of tags used for OA and GT-seq are almost completely non-  
408 overlapping, an outcome produced by distinct filters imposed on the initial list of  
409 candidate tags during assay development (see Methods; Figure 3). Accordingly,  
410 agreement between both molecular methods is even stronger evidence in favor of the  
411 inferred molecular genotype than that provided by one or the other molecular method by  
412 itself. Table 2 shows that the two molecular methods agree at least 95% of the time (an  
413 average of 98%), except in the case of 2Rc in *An. gambiae*.

414  
415 We hypothesized that some genotypic discordances, specifically those in which the two  
416 molecular methods agree but conflict with cytogenetics, are caused by cytogenetic  
417 errors rather than systematic biases in the molecular approaches. This is difficult to  
418 demonstrate conclusively, because the specimens used to compare the three  
419 genotyping methods have not been subjected to whole genome sequencing.  
420 Furthermore, it was not possible to double-check the cytogenetic karyotypes of the

421 specimens with discordances in the majority of cases, because neither slides nor  
422 ovaries were available. However, there is strong evidence consistent with cytogenetic  
423 error. During sampling in the field, specimens were assigned numerical identifiers that  
424 incremented by “1” throughout the process; cytogenetic karyotyping was later split  
425 between two institutions on the basis of even- or odd-numbered identifiers (see  
426 Methods). This procedure virtually eliminates the possibility of biases owing to temporal  
427 or spatial heterogeneities during the course of the mosquito sampling. Because even-  
428 and odd-numbered specimens should be random subsamples from the same  
429 populations, we would expect no difference in discordance rates between them. This  
430 was not what we found. Of the specimens assayed by both molecular methods in this  
431 study, 280 were odd-numbered and 677 even-numbered. Focusing on the inversions  
432 with the largest numbers of specimens whose cytogenetic and joint molecular  
433 genotypes disagreed (2La, 73; 2Rb, 41; 2Ru, 56; Table 2), the combined 170 such  
434 discordances occurred disproportionately in even-numbered specimens: 169 of the 170.  
435 Analyses of 2x2 contingency tables demonstrated highly significant departures from the  
436 null hypothesis (by Chi-square and Fisher exact probability tests), consistent with the  
437 notion that cytogenetic error disproportionately affecting the even-numbered specimens  
438 is responsible for these genotypic discrepancies (~5%). If this is the case, then based  
439 on the fact that both molecular approaches agree >95% of the time, we suggest that the  
440 true error rate for either molecular approach is <5%, probably closer to ~2%.

441

442 It is important to recognize that although the tag SNPs assayed by the two molecular  
443 approaches are largely non-overlapping for technical reasons, the assumptions

444 underlying the ascertainment of the initial set of candidate tags were the same. The  
445 implication is that if those assumptions are violated in natural populations, both  
446 approaches may agree on the wrong genotype. The tags were ascertained in the  
447 Ag1000G variation database, whose content was heavily biased toward *An. gambiae* at  
448 the time of their discovery (Love *et al.* 2019). Available samples of *An. coluzzii* were  
449 more limited in numbers and geographic representation, although Burkina Faso was  
450 one of two countries represented for this species. In addition to the issue of sampling  
451 limitations is the issue of unsuspected (cryptic) population structure that could affect the  
452 performance of these tags. Population structure could arise from several non-mutually  
453 exclusive scenarios: (i) a lack or reduction of connectivity between natural populations;  
454 (ii) local heterogeneity in selection pressures acting on targets inside the inversion;  
455 and/or (iii) violation of the assumption that the focal inversion arose uniquely (*i.e.*, has a  
456 monophyletic origin). We suspect that at least one of these scenarios applies to 2Rc  
457 tags ascertained in *An. gambiae*, probably explaining their lower rate of apparent  
458 success in genotyping (based on lower concordance values across the board; Table 2).  
459 Previous work has shown that applying candidate tags to a taxon in which they are not  
460 valid has the effect of downwardly biasing the average number of inferred alternate  
461 alleles (Love *et al.* 2019). Consistent with this, if 2Rd tags in the present study were  
462 inappropriately applied to *An. coluzzii*, the vast majority (38 of 39) of specimens  
463 genotyped cytogenetically as heterozygotes would be molecularly genotyped as  
464 standard homozygotes (Table S3). Based on this, we expect the systematic  
465 underestimation of the number of alternate alleles to produce a distinctive pattern where  
466 ‘true’ standard homozygotes are correctly identified, but heterozygotes and inverted

467 homozygotes would be incorrectly genotyped molecularly as standard homozygotes.  
468 Table 3 shows the distribution of discordant genotypes between cytogenetics and joint  
469 molecular methods when broken down by genotypic class: standard homozygotes,  
470 heterozygotes, and inverted homozygotes. While we have no objective measure of  
471 which specimens are ‘true’ heterozygotes and ‘true’ inverted homozygotes, it is  
472 noteworthy that the discordances for all inversions other than 2Rc in *An. gambiae* either  
473 skew toward molecular genotypes of ‘1’ or ‘2’, or they are roughly equally distributed  
474 between ‘1’ or ‘2’ and ‘0’. The pattern for 2Rc in *An. gambiae* is distinctive, in that the  
475 skew is strongly toward molecular genotypes of ‘0’, which is consistent with tags that  
476 may not be appropriately suited for the *An. gambiae* population in which they are  
477 applied. Further study is both required and merited, to understand the cause(s) of  
478 population structure between the populations used to develop the 2Rc tags for in *An.*  
479 *gambiae* in Ag1000G and those used to test the tags in the present study. Interestingly,  
480 2Rc contains cytochrome P450 genes implicated in insecticide resistance in *An.*  
481 *gambiae* and *An. coluzzii* (Love *et al.* 2016; Main *et al.* 2015), and more broadly,  
482 Coluzzi and colleagues (2002) observed that the region spanned by 2Rc is involved in  
483 many rearrangements that differentiate members of the *An. gambiae* species complex,  
484 leading these authors to propose that this region may have ecological relevance with  
485 respect to larval breeding site adaptations.

486  
487 Although we find good concordance between both molecular genotyping approaches,  
488 GT-seq more often agreed with cytogenetics than did OA (Table 2). This is not  
489 surprising, given the hybridization-based nature of OA and the extremely high levels of

490 nucleotide diversity found in *An. coluzzii* and *An. gambiae* (Miles *et al.* 2017). In  
491 addition, highly concordant candidate tag SNPs that also had low polymorphism in the  
492 ~50 bp immediately surrounding the tag, as required by OA, were sufficiently rare that  
493 we were compelled to lower the concordance threshold to find enough candidates  
494 suitable for assay design, and consequently the total number of OA tags per inversion is  
495 smaller than for GT-seq (Table 1). These factors likely compound to lower the  
496 performance of OA compared to GT-seq. Furthermore, as detailed by Campbell *et al.*  
497 (2015), genotyping costs are lower for GT-seq compared with OA. Nevertheless, if the  
498 number of tag SNPs to be genotyped is low (50-100) and the number of samples high  
499 ( $10^2$  to  $10^3$ ), OA remains a cost effective option and is still widely used (Campbell *et al.*  
500 2015).

501



502  
503  
504  
505  
506  
507  
508  
509  
510  
511  
512  
513  
514  
515  
516  
517  
518  
519  
520  
521

## CONCLUSIONS

Chromosomal inversions have been viewed as instruments of ecotypic differentiation in anopheline mosquitoes (Coluzzi 1982). Insights into their adaptive significance as balanced polymorphisms and their possible role in behavioral variation, optimal habitat choice, and the speciation process (Coluzzi 1982) were gained from extensive polytene chromosome analyses largely conducted in the pre-genomic era (Coluzzi *et al.* 2002; Coluzzi *et al.* 1979; Manoukis *et al.* 2008; Toure *et al.* 1998). Now, with access to reference genome assemblies and powerful functional genomics tools, the potential exists to probe molecular mechanisms and deepen our understanding. Yet, a major limitation to progress in this area has been the strict requirement for polytene chromosome analysis, which not only limits samples but also demands rare cytogenetic expertise whose throughput is low. Here we demonstrate that tag SNPs highly correlated with inversion status can be used for joint molecular genotyping of common inversions in *An. gambiae* and *An. coluzzii* across the genome (*i.e.*, for karyotyping). Molecular genotyping methods, both OA and GT-seq, can be performed at scale and the results are comparable or superior to traditional cytogenetic karyotyping. These tools invite a renewal of investigations into the role of chromosomal inversions in anopheline behavior and environmental adaptation.

522  
523  
524  
525  
526  
527  
528  
529  
530  
531  
532  
533  
534  
535  
536  
537  
538  
539

## ACKNOWLEDGEMENTS

We thank the technicians of IRD/IRSS/Centre Muraz of Burkina Faso for their fundamental contribution to the field work, as well as the inhabitants of the sampled villages for their kind collaboration. We thank M. Kern and R. Montañez-Gonzalez (University of Notre Dame) for assistance with DNA extraction. The Notre Dame Center for Research Computing provided technical support. We thank Dana-Farber/Harvard Cancer Center in Boston, MA, for the use of the Genotyping and Genetics for Population Sciences Core, which provided SNP analysis using the Taqman OpenArray Genotyping System. We acknowledge the Notre Dame Genomics and Bioinformatics Core Facility for assistance with GT-seq project development, library preparation, and sequencing. This work was supported by the National Institutes of Health (R01 AI125360 awarded to NJB). During this work, NJB was supported by Target Malaria, which receives core funding from the Bill & Melinda Gates Foundation and from the Open Philanthropy Project Fund, an advised fund of Silicon Valley Community Foundation. Dana-Farber/Harvard Cancer Center is supported in part by an NCI Cancer Center Support Grant # NIH 5 P30 CA06516.

540  
541  
542  
543  
544  
545  
546  
547  
548  
549  
550  
551  
552  
553  
554  
555  
556  
557  
558

## FIGURE LEGENDS

**Figure 1.** Locations of tag SNPs assayed for each inversion for OA and GT-seq. The bottom panel labeled 2Rdu shows inversions 2Ru and 2Rd on the same panel, as 2Ru is wholly encompassed by 2Rd. Vertical lines indicate SNPs common to both methods.

**Figure 2.** Concordance heat map of genotypes imputed by cytogenetics (CYT), OA, and GT-seq. Each row is an individual mosquito, and each column compares inversion genotypes derived from three genotyping approaches for a given inversion (a, 2La; j, 2Rj; b, 2Rb; c, 2Rc; d, 2Rd; u, 2Ru). Rows are grouped by species; 2Rj and 2Rd tags are not applicable in *An. coluzzii*. Green represents 3-way genotypic concordance; yellow, concordance between OA and GT-seq; purple, concordance between CYT and GT-seq; black, concordance between CYT and OA; gray is missing data; red is 3-way discordance.

**Figure 3.** Venn diagrams showing degree of overlap between tag SNPs developed for *in silico* inversion genotyping by Love *et al.* (2019) and those developed in this study for OA and GT-seq.

559  
560  
561  
562  
563  
564  
565  
566  
567  
568  
569  
570  
571  
572  
573  
574  
575  
576  
577  
578  
579  
580  
581  
582  
583  
584  
585  
586  
587  
588  
589  
590  
591  
592  
593  
594  
595  
596  
597  
598  
599  
600  
601  
602  
603  
604

## LITERATURE CITED

- Ayala D, Acevedo P, Pombi M, *et al.* (2017) Chromosome inversions and ecological plasticity in the main African malaria mosquitoes. *Evolution*, **71**, 686-701.
- Ayala D, Zhang S, Chateau M, *et al.* (2019) Association mapping desiccation resistance within chromosomal inversions in the African malaria vector *Anopheles gambiae*. *Molecular Ecology*, **28**, 1333-1342.
- Besansky NJ, Powell JR (1992) Reassociation kinetics of *Anopheles gambiae* (Diptera: Culicidae) DNA. *Journal of Medical Entomology*, **29**, 125-128.
- Campbell NR, Harmon SA, Narum SR (2015) Genotyping-in-Thousands by sequencing (GT-seq): A cost effective SNP genotyping method based on custom amplicon sequencing. *Molecular Ecology Resources*, **15**, 855-867.
- Cassone BJ, Molloy MJ, Cheng C, *et al.* (2011) Divergent transcriptional response to thermal stress by *Anopheles gambiae* larvae carrying alternative arrangements of inversion 2La. *Molecular Ecology*, **20**, 2567-2580.
- Chen H, Rangasamy M, Tan SY, Wang H, Siegfried BD (2010) Evaluation of five methods for total DNA extraction from western corn rootworm beetles. *PLoS One*, **5**, e11963.
- Cheng C, Tan JC, Hahn MW, Besansky NJ (2018) A systems genetic analysis of inversion polymorphisms in the malaria mosquito *Anopheles gambiae*. *Proceedings of the National Academy of Sciences of the United States of America*, **115**, E7005-E7014.
- Coluzzi M (1982) Spatial distribution of chromosomal inversions and speciation in anopheline mosquitoes. In: *Mechanisms of Speciation* (ed. Barigozzi C), pp. 143-153. Alan R. Liss, Inc., New York.
- Coluzzi M, Sabatini A, Della Torre A, Di Deco MA, Petrarca V (2002) A polytene chromosome analysis of the *Anopheles gambiae* species complex. *Science*, **298**, 1415-1418.
- Coluzzi M, Sabatini A, Petrarca V, Di Deco MA (1979) Chromosomal differentiation and adaptation to human environments in the *Anopheles gambiae* complex. *Transactions of the Royal Society of Tropical Medicine and Hygiene*, **73**, 483-497.
- Costantini C, Ayala D, Guelbeogo WM, *et al.* (2009) Living at the edge: biogeographic patterns of habitat segregation conform to speciation by niche expansion in *Anopheles gambiae*. *BMC Ecology*, **9**, 16.
- Coulibaly MB, Pombi M, Caputo B, *et al.* (2007) PCR-based karyotyping of *Anopheles gambiae* inversion 2Rj identifies the BAMAKO chromosomal form. *Malaria Journal*, **6**, 133.
- Della Torre A (1997) Polytene chromosome preparation from anopheline mosquitoes. In: *Molecular Biology of Disease Vectors: A Methods Manual* (eds. Crampton JM, Beard CB, Louis C), pp. 329-336. Chapman & Hall, London.
- Favia G, Della Torre A, Bagayoko M, *et al.* (1997) Molecular identification of sympatric chromosomal forms of *Anopheles gambiae* and further evidence of their reproductive isolation. *Insect Molecular Biology*, **6**, 377-383.
- Fouet C, Gray E, Besansky NJ, Costantini C (2012) Adaptation to aridity in the malaria mosquito *Anopheles gambiae*: chromosomal inversion polymorphism and body size influence resistance to desiccation. *PLoS One*, **7**, e34841.
- George P, Sharakhova MV, Sharakhov IV (2010) High-resolution cytogenetic map for the African malaria vector *Anopheles gambiae*. *Insect Molecular Biology*, **19**, 675-682.
- Gray EM, Rocca KA, Costantini C, Besansky NJ (2009) Inversion 2La is associated with enhanced desiccation resistance in *Anopheles gambiae*. *Malaria Journal*, **8**, 215.

- 605 Hoffmann AA, Rieseberg LH (2008) Revisiting the impact of inversions in evolution: from  
606 population genetic markers to drivers of adaptive shifts and speciation? *Annual Review of*  
607 *Ecology Evolution and Systematics*, **39**, 21-42.
- 608 Kirkpatrick M (2010) How and why chromosome inversions evolve. *PLoS Biology*, **8**, e1000501.
- 609 Kirkpatrick M, Barton N (2006) Chromosome inversions, local adaptation and speciation.  
610 *Genetics*, **173**, 419-434.
- 611 Lobo NF, Sangare DM, Regier AA, *et al.* (2010) Breakpoint structure of the *Anopheles gambiae*  
612 2Rb chromosomal inversion. *Malaria Journal*, **9**, 293.
- 613 Love RR, Redmond SN, Pombi M, *et al.* (2019) In silico karyotyping of chromosomally  
614 polymorphic malaria mosquitoes in the *Anopheles gambiae* complex. *G3 (Bethesda)*, **9**,  
615 3249-3262.
- 616 Love RR, Steele AM, Coulibaly MB, *et al.* (2016) Chromosomal inversions and ecotypic  
617 differentiation in *Anopheles gambiae*: the perspective from whole-genome sequencing.  
618 *Molecular Ecology*, **25**, 5889-5906.
- 619 Main BJ, Lee Y, Collier TC, *et al.* (2015) Complex genome evolution in *Anopheles coluzzii*  
620 associated with increased insecticide usage in Mali. *Molecular Ecology*, **24**, 5145-5157.
- 621 Manoukis NC, Powell JR, Touré MB, *et al.* (2008) A test of the chromosomal theory of ecotypic  
622 speciation in *Anopheles gambiae*. *Proceedings of the National Academy of Science U S*  
623 *A*, **105**, 2940-2945.
- 624 Miles A, Harding NJ, Bottà G, *et al.* (2017) Genetic diversity of the African malaria vector  
625 *Anopheles gambiae*. *Nature*, **552**, 96-100.
- 626 Molineaux L, Gramiccia G (1980) *The Garki Project. Research on the Epidemiology and*  
627 *Control of Malaria in the Sudan Savanna of West Africa* World Health Organization,  
628 Geneva, Switzerland.
- 629 Montanez-Gonzalez R, Pichler V, Calzetta M, *et al.* (2020) Highly specific PCR-RFLP assays  
630 for karyotyping the widespread 2Rb inversion in malaria vectors of the *Anopheles*  
631 *gambiae* complex. *Parasit Vectors*, **13**, 16.
- 632 Petrarca V, Beier JC (1992) Intraspecific chromosomal polymorphism in the *Anopheles gambiae*  
633 complex as a factor affecting malaria transmission in the Kisumu area of Kenya.  
634 *American Journal of Tropical Medicine and Hygiene*, **46**, 229-237.
- 635 Pombi M, Caputo B, Simard F, *et al.* (2008) Chromosomal plasticity and evolutionary potential  
636 in the malaria vector *Anopheles gambiae sensu stricto*: insights from three decades of  
637 rare paracentric inversions. *BMC Evolutionary Biology*, **8**, 309.
- 638 Reidenbach KR, Cheng C, Liu F, *et al.* (2014) Cuticular differences associated with aridity  
639 acclimation in African malaria vectors carrying alternative arrangements of inversion  
640 2La. *Parasit Vectors*, **7**, 176.
- 641 Riehle MM, Bukhari T, Gneme A, *et al.* (2017) The *Anopheles gambiae* 2La chromosome  
642 inversion is associated with susceptibility to *Plasmodium falciparum* in Africa. *Elife*, **6**.
- 643 Rishikesh N, Di Deco MA, Petrarca V, Coluzzi M (1985) Seasonal variations in indoor resting  
644 *Anopheles gambiae* and *Anopheles arabiensis* in Kaduna, Nigeria. *Acta Tropica*, **42**, 165-  
645 170.
- 646 Rocca KA, Gray EM, Costantini C, Besansky NJ (2009) 2La chromosomal inversion enhances  
647 thermal tolerance of *Anopheles gambiae* larvae. *Malaria Journal*, **8**, 147.
- 648 Schaeffer SW (2008) Selection in heterogeneous environments maintains the gene arrangement  
649 polymorphism of *Drosophila pseudoobscura*. *Evolution*, **62**, 3082-3099.

- 650 Scott JA, Brogdon WG, Collins FH (1993) Identification of single specimens of the *Anopheles*  
651 *gambiae* complex by the polymerase chain reaction. *American Journal of Tropical*  
652 *Medicine and Hygiene*, **49**, 520-529.
- 653 Toure YT, Petrarca V, Traore SF, *et al.* (1998) The distribution and inversion polymorphism of  
654 chromosomally recognized taxa of the *Anopheles gambiae* complex in Mali, West Africa.  
655 *Parassitologia*, **40**, 477-511.
- 656 Wellenreuther M, Bernatchez L (2018) Eco-Evolutionary Genomics of Chromosomal Inversions.  
657 *Trends in Ecology & Evolution*, **33**, 427-440.
- 658 White BJ, Santolamazza F, Kamau L, *et al.* (2007) Molecular karyotyping of the 2La inversion  
659 in *Anopheles gambiae*. *American Journal of Tropical Medicine and Hygiene*, **76**, 334-  
660 339.
- 661
- 662

663 **Figure 1.**

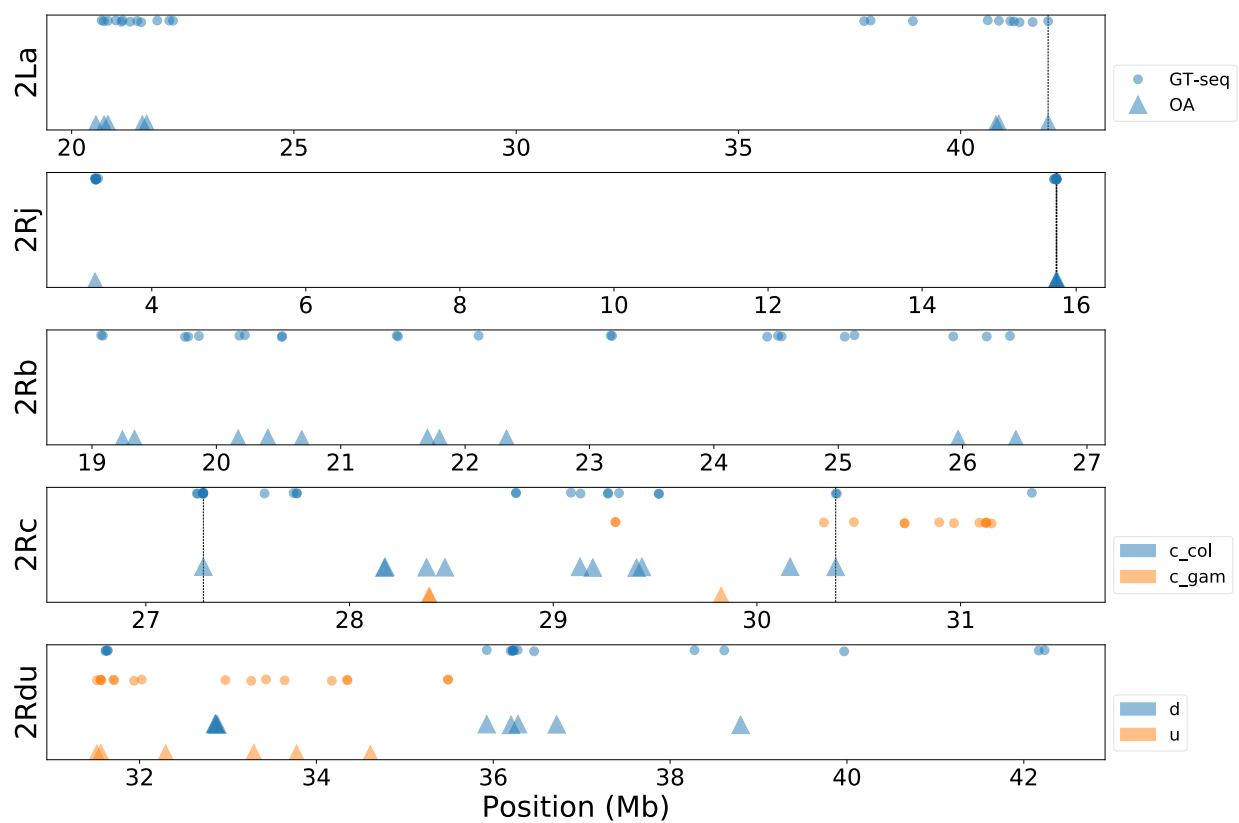

664

665

666

667 **Figure 2.**

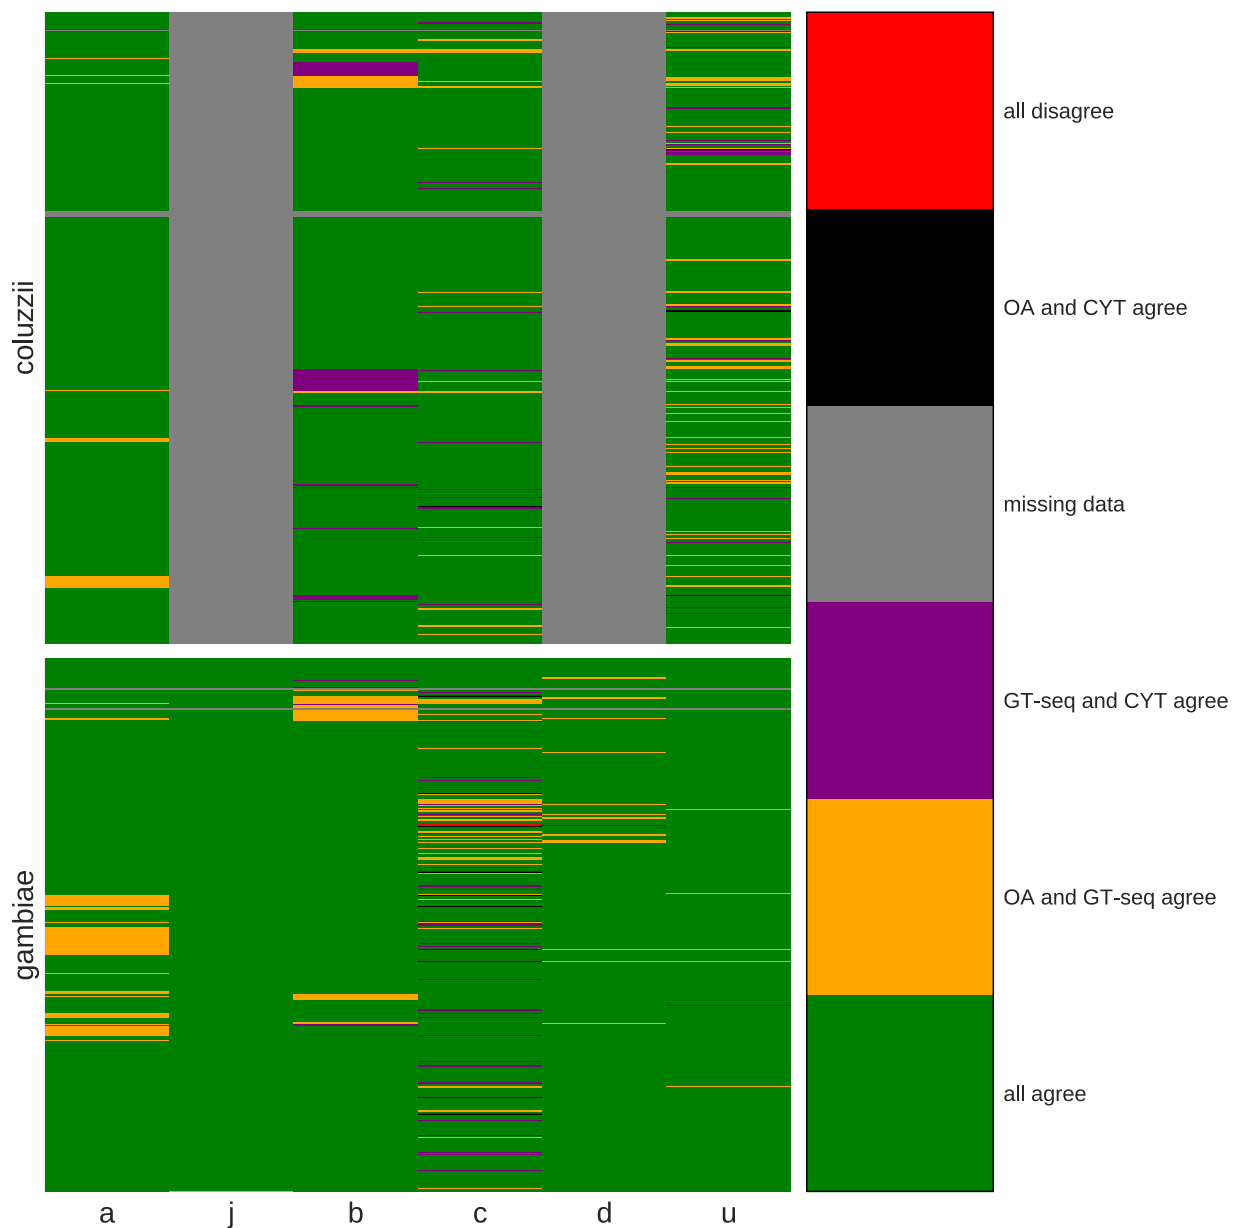

668

669

670



671 Figure 3.

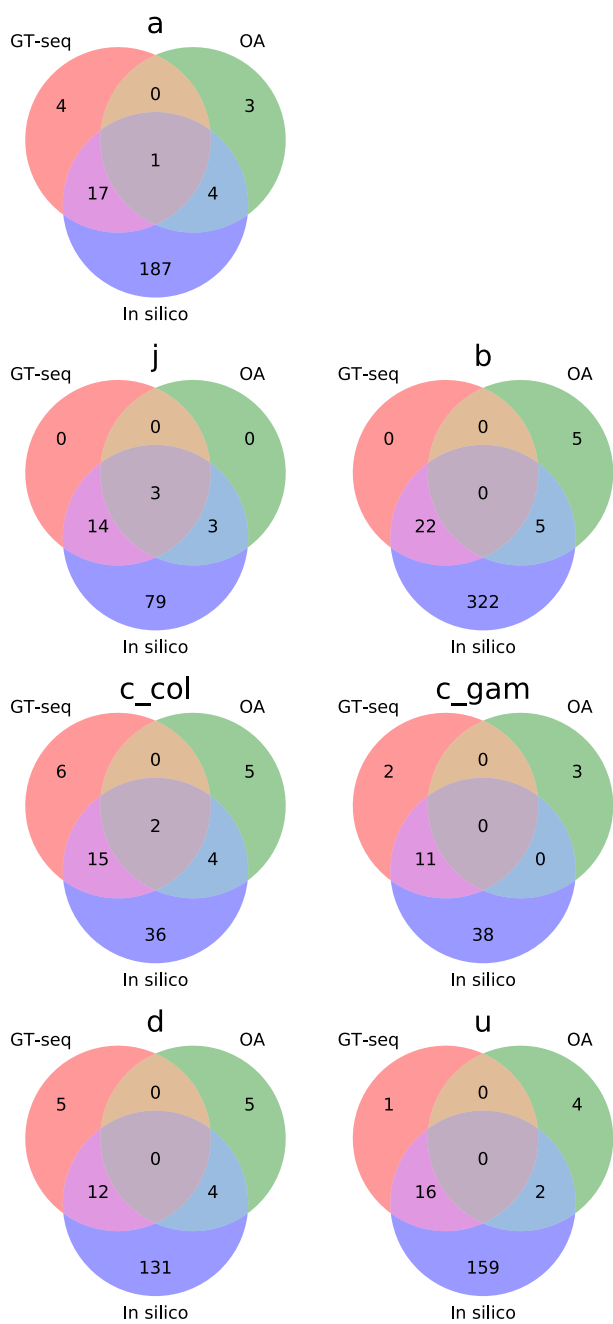

672

673

674

675 Table 1. The number of tag SNPs by inversion and molecular method.

676

| Inversion    | GT-seq tag SNPs | OA tag SNPs |
|--------------|-----------------|-------------|
| 2La          | 22              | 8           |
| 2Rj          | 17              | 6           |
| 2Rb          | 22              | 10          |
| 2Rc_col      | 23              | 11          |
| 2Rc_gam      | 13              | 3           |
| 2Ru          | 17              | 6           |
| 2Rd          | 17              | 9           |
| <b>Total</b> | <b>131</b>      | <b>53</b>   |

677 Table 2. Concordance of genotypes imputed by cytogenetics (CYT), OA, and GT-seq for each inversion.

|                                    | 2La, N (%)  | 2Rj, N (%)  | 2Rb, N (%)  | 2Rc-col, N (%) | 2Rc-gam, N (%) | 2Rd, N (%)  | 2Ru, N (%)  |
|------------------------------------|-------------|-------------|-------------|----------------|----------------|-------------|-------------|
| Concordance:                       |             |             |             |                |                |             |             |
| Three-way                          | 875 (92.30) | 434 (99.77) | 864 (91.14) | 483 (94.15)    | 352 (80.92)    | 420 (96.55) | 870 (91.77) |
| Discordance:                       |             |             |             |                |                |             |             |
| CYT vs (GT-seq + OA)               | 73 (7.70)   | 1 (0.23)    | 41 (4.32)   | 18 (3.51)      | 39 (8.97)      | 14 (3.22)   | 56 (5.91)   |
| All other                          | 0 (0)       | 0 (0)       | 43 (4.54)   | 12 (2.34)      | 44 (10.11)     | 1 (0.23)    | 22 (2.32)   |
| (CYT + GT-seq) vs OA               | 0 (0)       | 0 (0)       | 43 (4.54)   | 11 (2.14)      | 31 (7.13)      | 1 (0.23)    | 19 (1.05)   |
| (CYT + OA) vs GT-seq               | 0 (0)       | 0 (0)       | 0 (0)       | 1 (0.19)       | 10 (2.30)      | 0 (0)       | 3 (0.32)    |
| Three-way                          | 0 (0)       | 0 (0)       | 0 (0)       | 0 (0)          | 3 (0.69)       | 0 (0)       | 0 (0)       |
| Specimens assayed by all 3 methods | <b>948</b>  | <b>435</b>  | <b>948</b>  | <b>513</b>     | <b>435</b>     | <b>435</b>  | <b>948</b>  |

679 Table 3. Concordance between CYT and both molecular methods by inversion  
 680 genotype (0, 1, 2) for specimens for which both molecular methods agree. Shown are  
 681 the numbers of specimens scored for each pairwise comparison.

|         |   | GT-seq + OA |            |            |
|---------|---|-------------|------------|------------|
|         |   | 0           | 1          | 2          |
| 2La     | 0 | 1           | 0          | 0          |
|         | 1 | 0           | <b>80</b>  | 2          |
|         | 2 | 1           | 70         | <b>794</b> |
| 2Rb     | 0 | <b>124</b>  | 1          | 7          |
|         | 1 | 1           | <b>491</b> | 9          |
|         | 2 | 7           | 16         | <b>249</b> |
| 2Rd     | 0 | <b>389</b>  | 7          | 0          |
|         | 1 | 7           | <b>31</b>  | 0          |
|         | 2 | 0           | 0          | <b>0</b>   |
| 2Ru     | 0 | <b>778</b>  | 39         | 10         |
|         | 1 | 7           | <b>84</b>  | 0          |
|         | 2 | 0           | 0          | <b>8</b>   |
| 2Rc_col | 0 | <b>153</b>  | 7          | 0          |
|         | 1 | 10          | <b>235</b> | 0          |
|         | 2 | 0           | 1          | <b>95</b>  |
| 2Rc_gam | 0 | <b>309</b>  | 1          | 0          |
|         | 1 | 34          | <b>43</b>  | 0          |
|         | 2 | 4           | 0          | <b>0</b>   |

682 CYT, cytogenetics; OA, Open Array

683

684
